# Supplementary material for: Coral mucus fuels the sponge loop in warm- and cold-water coral reef ecosystems
Source: PubMed Central journal article supplement (PMC4703987; doi:10.1038/srep18715), 2016-01-07
Supplement: srep18715-s1.pdf [file srep18715-s1.pdf]

## **Coral mucus fuels the sponge loop in warm- and cold-water coral reef ecosystems**

Laura Rix<sup>1\*</sup>, Malik S. Naumann<sup>1</sup>, Jasper M. de Goeij<sup>2</sup>, Christina E. Mueller<sup>3</sup>, Ulrich Struck<sup>4</sup>, Jack J. Middelburg<sup>5</sup>, Fleur C. van Duyl<sup>6</sup>, Fuad A. Al-Horani<sup>7</sup>, Christian Wild<sup>1,8</sup>, Dick van Oevelen<sup>3</sup>

<sup>1</sup>Coral Reef Ecology Group (CORE), Leibniz Center for Tropical Marine Ecology (ZMT), Fahrenheitstr. 6, 28359 Bremen, Germany

<sup>2</sup>Department of Aquatic Environmental Ecology, Institute for Biodiversity and Ecosystem Dynamics, University of Amsterdam, PO Box 94248, 1090 GE Amsterdam, the Netherlands

<sup>3</sup>Royal Netherlands Institute for Sea Research (NIOZ-Yerseke), PO Box 140, 4400 AC Yerseke, the Netherlands

<sup>4</sup>Museum für Naturkunde, Leibniz Institute for Evolution and Biodiversity Science, Invalidenstr. 43, 10115 Berlin, Germany

<sup>5</sup>Department of Earth Sciences – Geochemistry, Utrecht University, PO Box 80.021, 3508 TA Utrecht, the Netherlands

<sup>6</sup>Royal Netherlands Institute for Sea Research (NIOZ-Texel), PO Box 59, 1790AB Den Burg, Texel, the Netherlands

<sup>7</sup>The University of Jordan – Aqaba and Marine Science Station (MSS), PO Box 2595, Aqaba 77110, Jordan

<sup>8</sup>Faculty of Biology and Chemistry (FB 2), University of Bremen, NW 2 / Leobener Str., 28359 Bremen, Germany

\*corresponding author, E-mail: [laura.n.rix@gmail.com](mailto:laura.n.rix@gmail.com)

## Supplementary Information:

### Supplementary Figures:

**Supplementary Figure S1: Flow-chart describing the three phases of the warm-water (WW) and cold-water (CW) stable isotope-tracer experiments.** Phase 1 describes the labeling of the WW and CW corals with  $^{13}\text{C}$  and  $^{15}\text{N}$  tracers, Phase 2 outlines the transfer of coral mucus-derived C and N from the  $^{13}\text{C}$  and  $^{15}\text{N}$ -labeled corals into the sponge tissues in aquaria flow-through set-ups (WW:  $n = 3$  aquaria replicates each with three sponge specimens per treatment) or a recirculation chamber set-up (CW:  $n = 1$  chamber set-ups with three sponge specimens per treatment), and Phase 3 shows the transfer of coral mucus-derived C and N from the  $^{13}\text{C}$  and  $^{15}\text{N}$ -labeled sponges to the sponge detritus in individual incubation chambers (WW:  $n = 9$ , CW:  $n = 3$ ).

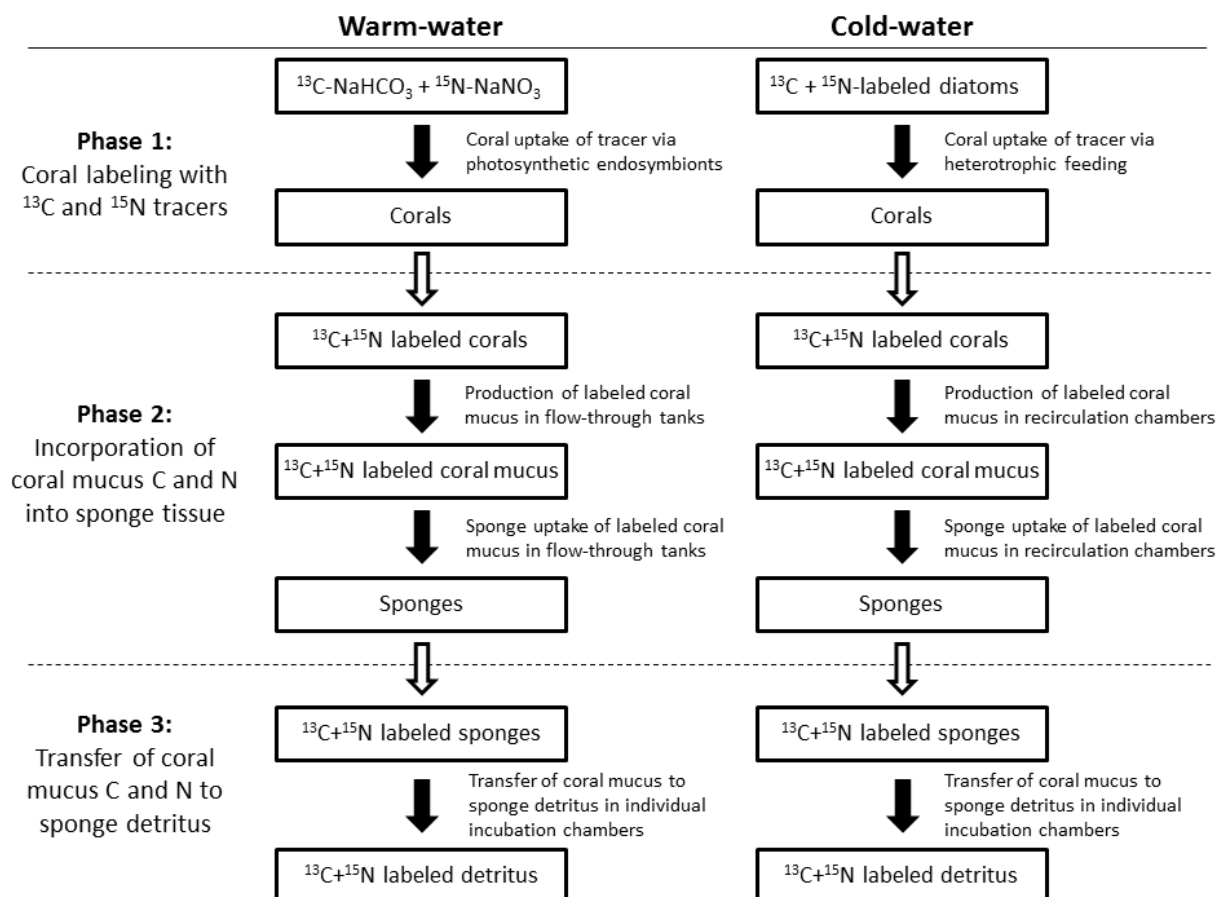

## Supplementary Tables

**Supplementary Table S1. Environmental parameters characteristic of warm-water (WW), Red Sea coral reefs and cold-water (CW), north Atlantic *Lophelia pertusa* reefs.** Parameters include dissolved inorganic nitrogen (DIN), soluble reactive phosphorus (SRP), dissolved organic carbon (DOC), particulate organic carbon (POC), particulate nitrogen (PN), and chlorophyll a (Chl a). <sup>a</sup> indicates the inorganic nutrient supply limiting WW coral growth and <sup>b</sup> the organic nutrient supply limiting CW coral growth.

| Parameter                                 | Warm-water<br>Red Sea coral reefs | Cold-water<br>North Atlantic coral reefs |
|-------------------------------------------|-----------------------------------|------------------------------------------|
| Depth (m)                                 | 1 – > 100 <sup>1</sup>            | 50 – > 1000 <sup>2</sup>                 |
| Temperature (°C)                          | 21 – 29 <sup>3</sup>              | 6 – 10 <sup>2,4,5</sup>                  |
| DIN (μmol L <sup>-1</sup> ) <sup>a</sup>  | 0.2 – 1.1 <sup>6</sup>            | 2.2 – 19.1 <sup>2</sup>                  |
| SRP (μmol L <sup>-1</sup> ) <sup>a</sup>  | 0.04 – 0.1 <sup>6</sup>           | 0.3 – 3.6 <sup>2</sup>                   |
| DOC (μmol L <sup>-1</sup> )               | 76 – 87 <sup>7</sup>              | 51 – 73 <sup>8</sup>                     |
| POC (μmol L <sup>-1</sup> ) <sup>b</sup>  | 6.3 – 10.3 <sup>6</sup>           | 1.2 – 5.2 <sup>4,9,10</sup>              |
| POC:PN                                    | 7.3– 10.2 <sup>6</sup>            | 5.8 – 9.0 <sup>4,9,10</sup>              |
| Chl a (μg L <sup>-1</sup> )               | 0.1 – 0.2 <sup>6</sup>            | 0.02 – 1.17 <sup>2</sup>                 |
| Current velocity (cm s <sup>-1</sup> )    | 0 – 10 <sup>3</sup>               | 0 – 50 <sup>2,4,5</sup>                  |
| Aragonite saturation (Ω <sub>arag</sub> ) | 3.7 – 4.4 <sup>3</sup>            | 1.4 – 2.4 <sup>2</sup>                   |
| pH                                        | 8.2 – 8.3 <sup>3</sup>            | 7.92 – 8.19 <sup>2</sup>                 |
| Salinity                                  | 40.5 – 41.0 <sup>3</sup>          | 34.6 – 35.7 <sup>2</sup>                 |

## Supplementary References

- 1 Fricke, H. W. & Schuhmacher, H. The depth limits of Red Sea stony corals: An ecophysiological problem (A deep diving survey by submersible). *Mar. Ecol.* **4**, 163-194, doi:10.1111/j.1439-0485.1983.tb00294.x (1983).
- 2 Findlay, H. S. *et al.* Fine-scale nutrient and carbonate system dynamics around cold-water coral reefs in the northeast Atlantic. *Scientific Reports* **4**, doi:10.1038/srep03671 (2014).
- 3 Silverman, J., Lazar, B. & Erez, J. Community metabolism of a coral reef exposed to naturally varying dissolved inorganic nutrient loads. *Biogeochemistry* **84**, 67-82, doi:10.1007/s10533-007-9075-5 (2007).
- 4 Wagner, H., Purser, A., Thomsen, L., Jesus, C. C. & Lundalv, T. Particulate organic matter fluxes and hydrodynamics at the Tisler cold-water coral reef. *J. Mar. Syst.* **85**, 19-29, doi:10.1016/j.jmarsys.2010.11.003 (2011).
- 5 Mienis, F. *et al.* Hydrodynamic controls on cold-water coral growth and carbonate-mound development at the SW and SE rockall trough margin, NE Atlantic ocean. *Deep-Sea*

- Research Part I-Oceanographic Research Papers* **54**, 1655-1674, doi:10.1016/j.dsr.2007.05.013 (2007).
- 6 Rix, L. *et al.* Seasonality in dinitrogen fixation and primary productivity by coral reef framework substrates from the northern Red Sea. *Mar. Ecol. Prog. Ser.* **533**, 79-92, doi:10.3354/meps11383 (2015).
- 7 Naumann, M. S. *et al.* Budget of coral-derived organic carbon in a fringing coral reef of the Gulf of Aqaba, Red Sea. *J. Mar. Syst.* **105**, 20-29, doi:10.1016/j.jmarsys.2012.05.007 (2012).
- 8 van Duyl, F. C., Hegeman, J., Hoogstraten, A. & Maier, C. Dissolved carbon fixation by sponge-microbe consortia of deep water coral mounds in the northeastern Atlantic Ocean. *Mar. Ecol. Prog. Ser.* **358**, 137-150, doi:10.3354/meps07370 (2008).
- 9 Kiriakoulakis, K., Freiwald, A., Fisher, E. & Wolff, G. A. Organic matter quality and supply to deep-water coral/mound systems of the NW European Continental Margin. *Int J Earth Sci* **96**, 159-170, doi:10.1007/s00531-006-0078-6 (2007).
- 10 Kiriakoulakis, K., Bett, B. J., White, M. & Wolff, G. A. Organic biogeochemistry of the Darwin Mounds, a deep-water coral ecosystem, of the NE Atlantic. *Deep-Sea Research Part I-Oceanographic Research Papers* **51**, 1937-1954, doi:10.1016/j.dsr.2004.07.010 (2004).
